# Supplementary material for: Environmentally friendly recycling and effective repairing of cathode powders from spent LiFePO4 batteries
Source: Royal Society of Chemistry journal article supplement (doi:10.1039/c5gc02650d), 2015-12-18
Supplement: c5gc02650d1.pdf [file c5gc02650d1.pdf]

# Environmentally friendly recycling and effective repairing of cathode powders from spent $\text{LiFePO}_4$ batteries

Jiangping Chen, Qingwen Li, Jishun Song, Dawei Song, Lianqi Zhang, Xianxing Shi

**Table S1** Tap densities of commercial  $\text{LiFePO}_4/\text{C}$  before and after heat-treated at 350 °C under  $\text{H}_2/\text{Ar}$  mixed gas atmosphere.

| $\text{LiFePO}_4/\text{C}$ | Tap density ( $\text{g cm}^{-3}$ ) |
|----------------------------|------------------------------------|
| Unheat-treated             | 1.130                              |
| Heat-treated at 350 °C     | 1.128                              |

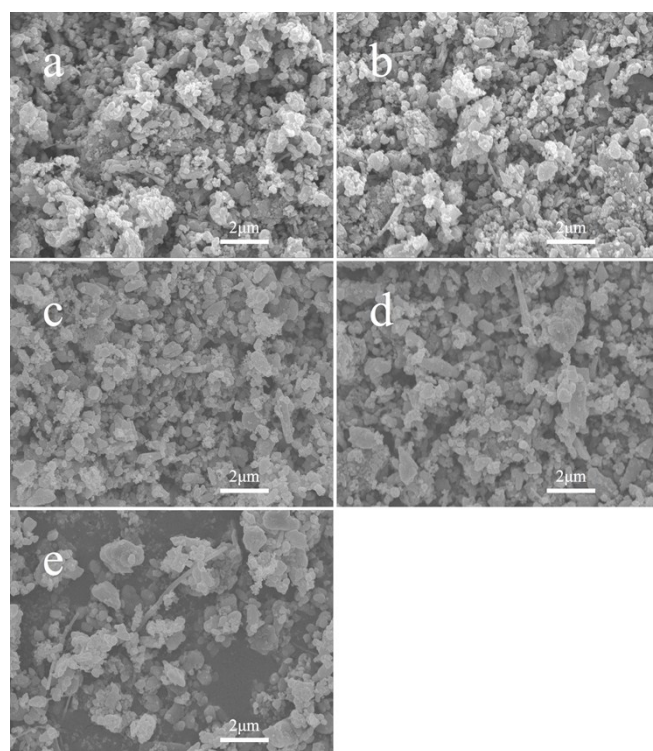

**Fig. S1** SEM images of cathode powders heat-treated at high temperatures. (a) S-600, (b) S-650, (c) S-700, (d) S-750 and (e) S-800.

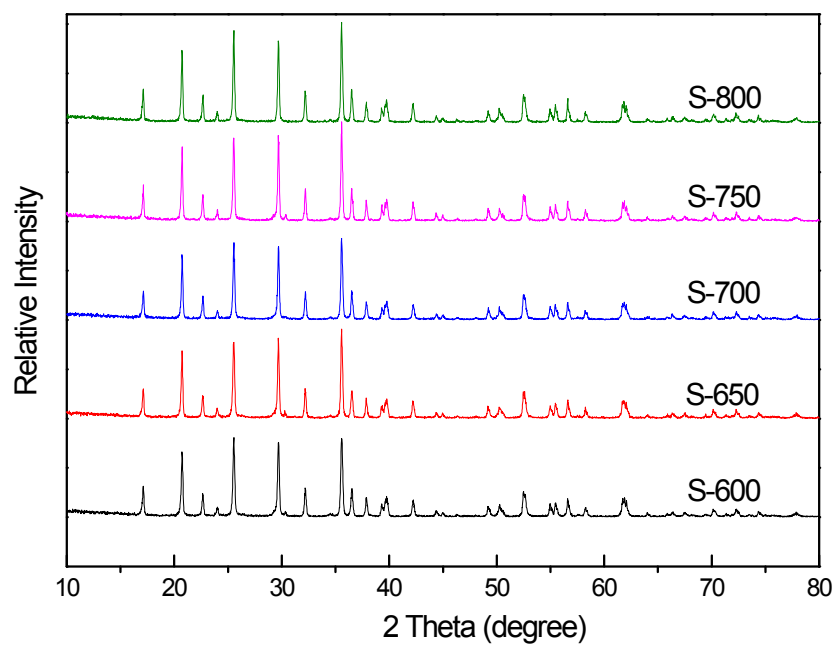

**Fig. S2** XRD patterns of cathode powders heat-treated at high temperatures.
